# Supplementary material for: Solid state molybdenum carbide nanomotors driven via high temperature carbon-decomposition catalytic reactions
Source: Royal Society of Chemistry journal article supplement (doi:10.1039/d2ra01846b), 2022-01-01
Supplement: d2ra01846b2.pdf [file d2ra01846b2.pdf]

## Supplementary information

### Solid state molybdenum carbide nanomotors driven via high temperature carbon-decomposition catalytic reactions

Tomoya Egoshi, Naoki Uemura, and Tokushi Kizuka\*

*Department of Materials Science, Faculty of Pure and Applied Sciences, University of Tsukuba, 1-1-1, Tennoudai, Tsukuba, Ibaraki 305-8573, Japan*

\*E-mail address: kizuka@ims.tsukuba.ac.jp

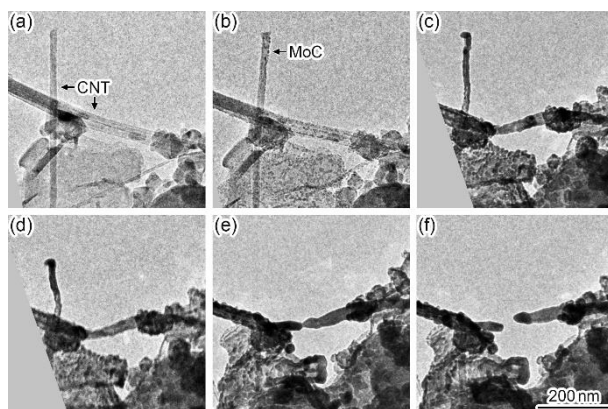

**Fig. S1** Time series of TEM images observed in the consumption and degradation process of CNTs by MoC nanoparticles during *in situ* laser irradiation. The surrounding region around the CNTs is the vacuum. The irradiation density during the observation of images (a), (b) and (c)–(f) was  $1 \times 10^7$  W/m<sup>2</sup>,  $5 \times 10^7$  W/m<sup>2</sup>, and  $6 \times 10^7$  W/m<sup>2</sup>, respectively.
